# Supplementary material
Source: HighWire-hosted journal article supplement (https://bmjophth.bmj.com/content/6/1/e000589)

## No. and model of secondary IOLs

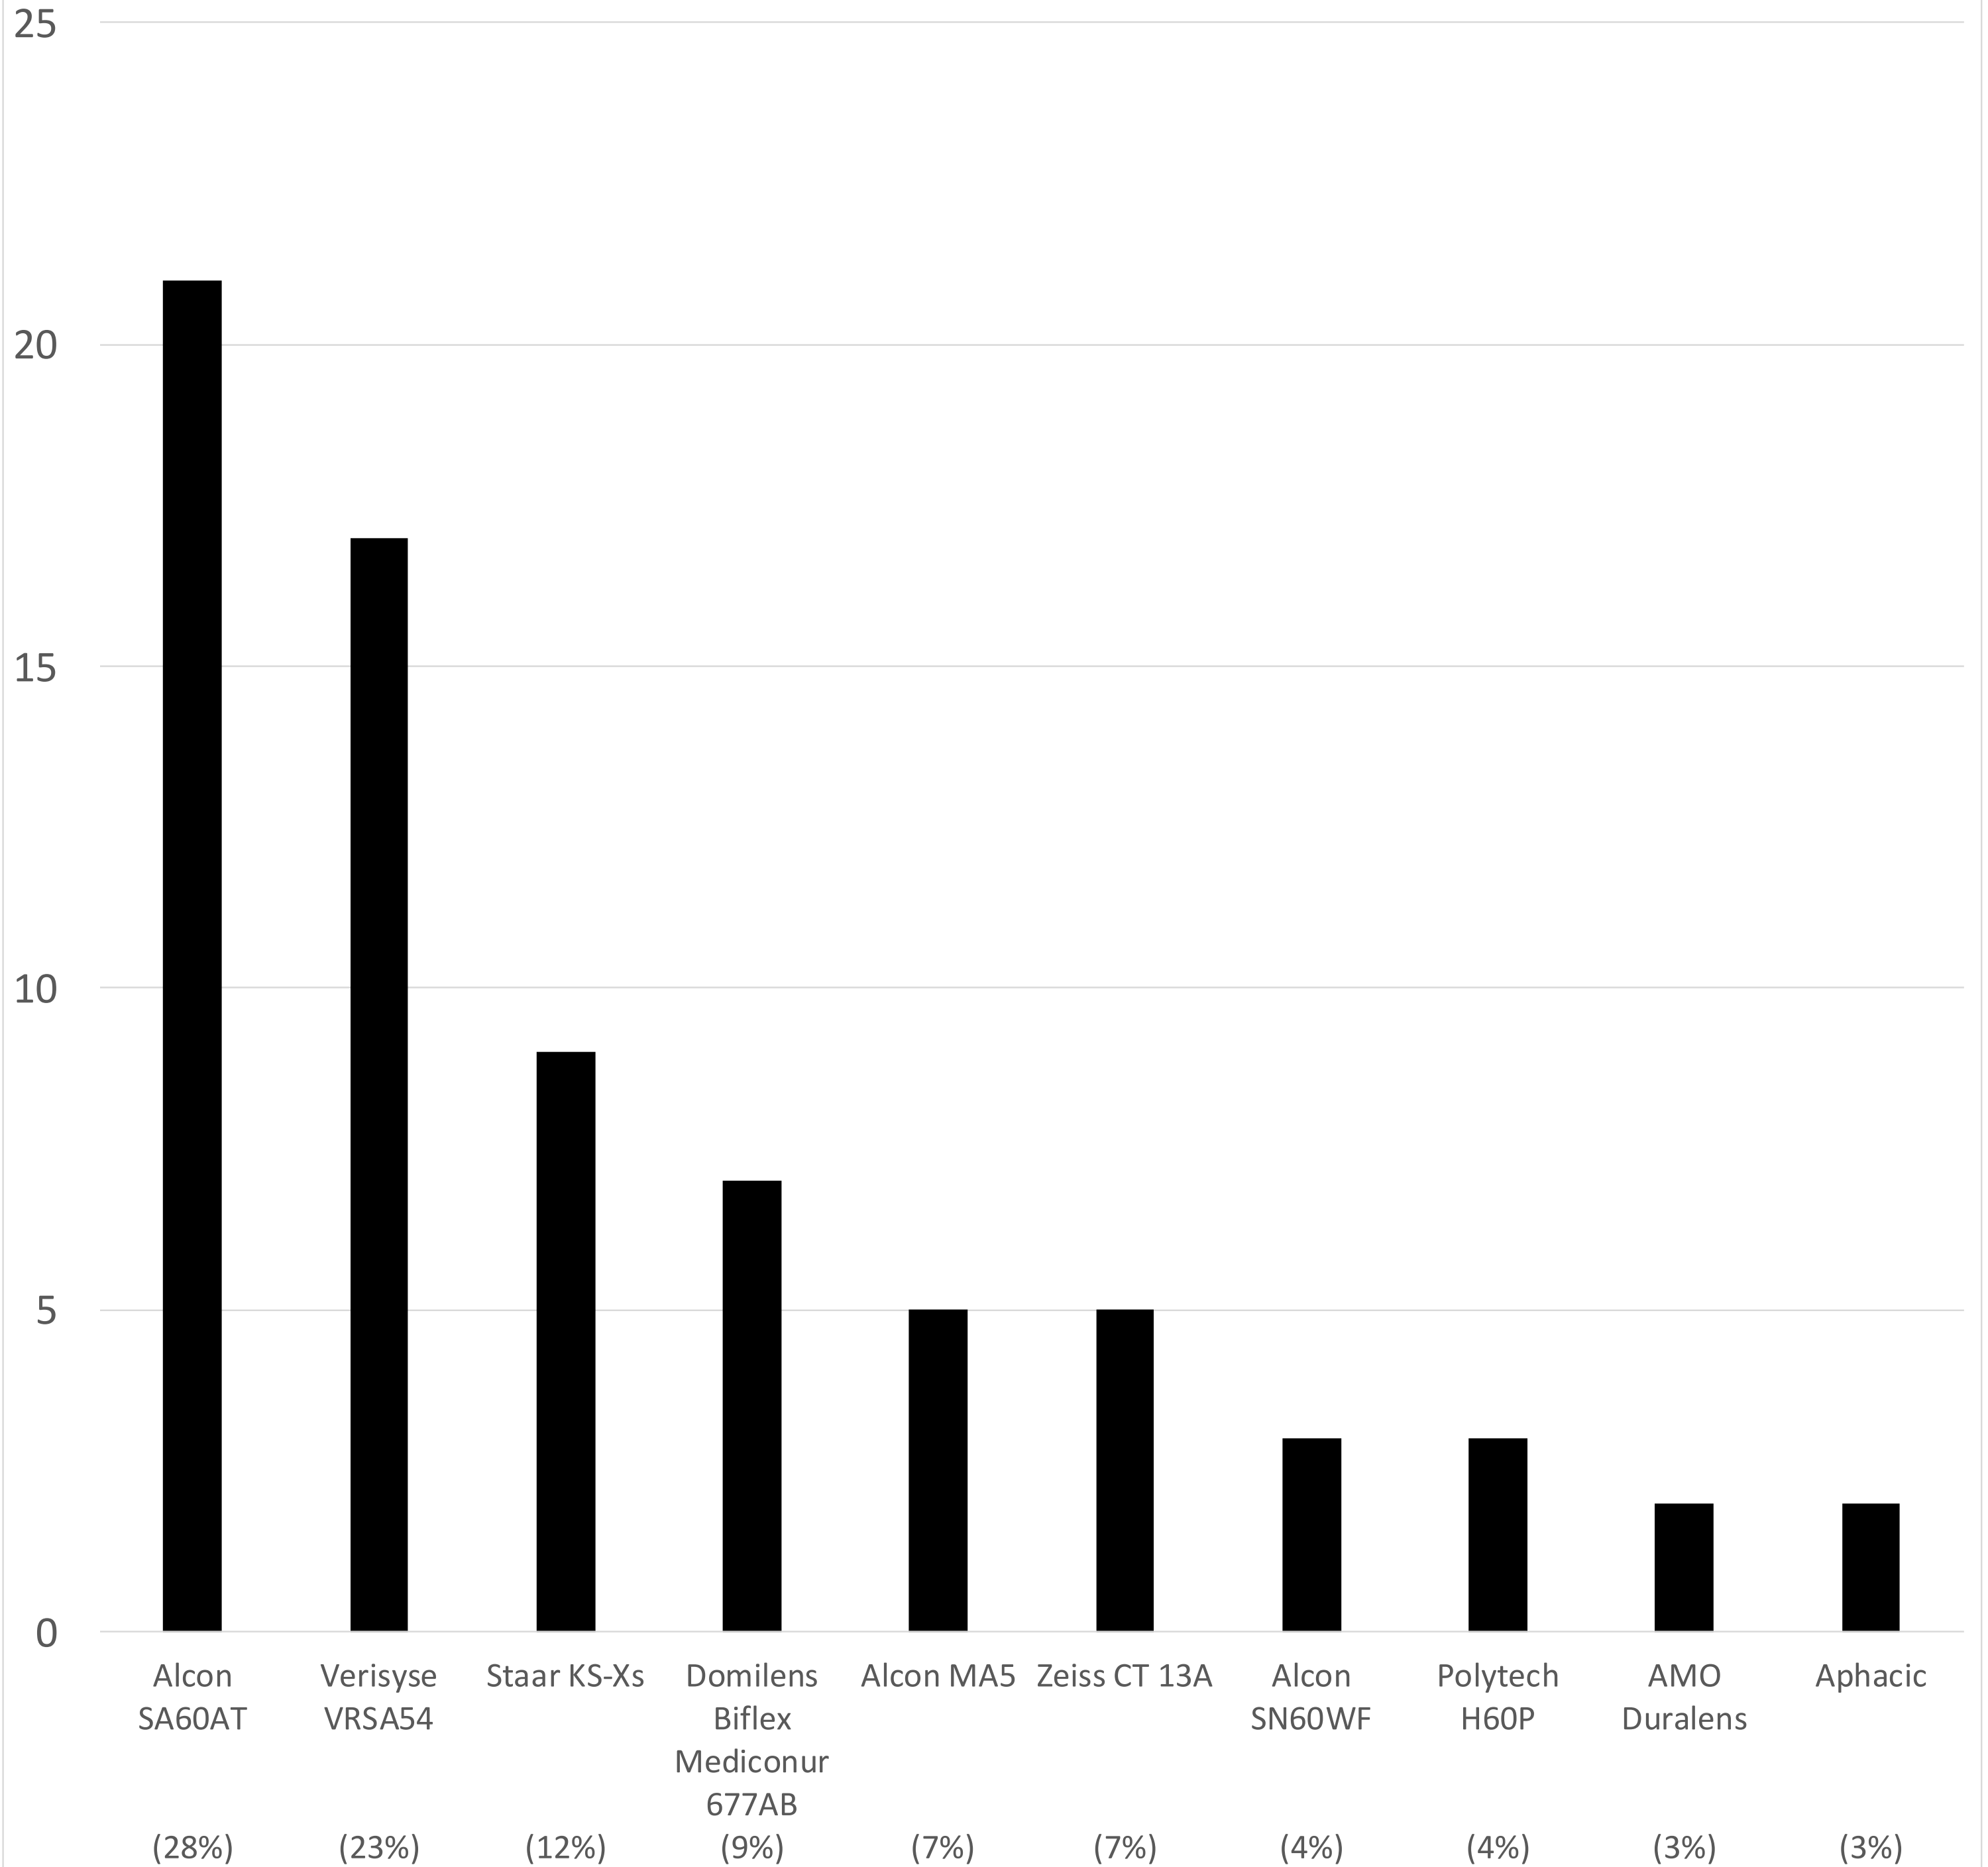

Supplement: inline-supplementary-material-4 [file inline-supplementary-material-4.pdf]
